# Supplementary material for: Thiocyanate-induced conformational transformation of a flexible fluconazole ligand in Cd(II) coordination polymers
Source: Royal Society of Chemistry journal article supplement (doi:10.1039/b914049b), 2009-10-13

## Supporting Information

### **Thiocyanate-induced conformational transformation of a flexible fluconazole ligand in Cd(II) coordination polymers**

Yun Ling,<sup>a</sup> Lei Zhang,<sup>a,\*</sup> Jing Li<sup>a</sup>, Shuan-Shi Fan<sup>a</sup> and Miao Du<sup>b</sup>

<sup>a</sup> *School of Chemistry and Chemical Engineering, South China University of Technology, Guangzhou 510640, P. R. China. Fax: +86 20 8711 0234; E-mail: lzhangce@scut.edu.cn (L. Zhang)*

<sup>b</sup> *College of Chemistry and Life Science, Tianjin Normal University, Tianjin 300074, P. R. China*

**Table S1.** Crystal data and structure refinements

|                                             | <b>1</b>                                                                                         | <b>2</b>                                                                          | <b>3</b>                                                                            | <b>4</b>                                                                          | <b>5</b>                                                                            | <b>6</b>                                                                                       |
|---------------------------------------------|--------------------------------------------------------------------------------------------------|-----------------------------------------------------------------------------------|-------------------------------------------------------------------------------------|-----------------------------------------------------------------------------------|-------------------------------------------------------------------------------------|------------------------------------------------------------------------------------------------|
| Empirical formula                           | C <sub>26</sub> H <sub>38</sub> CdCl <sub>2</sub> F <sub>4</sub> N <sub>12</sub> O <sub>12</sub> | C <sub>39</sub> H <sub>37</sub> CdF <sub>8</sub> N <sub>20</sub> O <sub>9.5</sub> | C <sub>27</sub> H <sub>24</sub> CdClF <sub>4</sub> N <sub>13</sub> O <sub>6</sub> S | C <sub>27</sub> H <sub>24</sub> CdF <sub>4</sub> N <sub>14</sub> O <sub>5</sub> S | C <sub>27</sub> H <sub>24</sub> CdClF <sub>4</sub> N <sub>13</sub> O <sub>5</sub> S | C <sub>28</sub> H <sub>38</sub> CdF <sub>4</sub> N <sub>14</sub> O <sub>4</sub> S <sub>2</sub> |
| Formula weight                              | 959.90                                                                                           | 1164.29                                                                           | 882.50                                                                              | 845.06                                                                            | 818.50                                                                              | 877.16                                                                                         |
| T [K]                                       | 293(2)                                                                                           | 293(2)                                                                            | 293(2)                                                                              | 293(2)                                                                            | 293(2)                                                                              | 293(2)                                                                                         |
| Wavelength [Å]                              | 0.71073                                                                                          | 0.71073                                                                           | 0.71073                                                                             | 0.71073                                                                           | 0.71073                                                                             | 0.71073                                                                                        |
| Crystal system                              | Triclinic                                                                                        | Triclinic                                                                         | Triclinic                                                                           | Triclinic                                                                         | Triclinic                                                                           | Monoclinic                                                                                     |
| Space group                                 | P-1                                                                                              | P-1                                                                               | P-1                                                                                 | P-1                                                                               | P-1                                                                                 | P2(1)/c                                                                                        |
| <i>a</i> [Å]                                | 8.0708(6)                                                                                        | 10.816(3)                                                                         | 10.6019(9)                                                                          | 10.693(6)                                                                         | 10.418(7)                                                                           | 8.965(6)                                                                                       |
| <i>b</i> [Å]                                | 10.1838(7)                                                                                       | 15.076(4)                                                                         | 12.0311(11)                                                                         | 12.064(7)                                                                         | 11.828(8)                                                                           | 12.605(9)                                                                                      |
| <i>c</i> [Å]                                | 11.5445(8)                                                                                       | 15.098(4)                                                                         | 14.5296(12)                                                                         | 14.206(8)                                                                         | 14.374(9)                                                                           | 17.485(14)                                                                                     |
| <i>α</i> [°]                                | 89.5510(10)                                                                                      | 79.599(4)                                                                         | 87.735(2)                                                                           | 87.859(7)                                                                         | 89.593(9)                                                                           |                                                                                                |
| <i>β</i> [°]                                | 86.1850(10)                                                                                      | 89.568(4)                                                                         | 77.347(2)                                                                           | 77.101(7)                                                                         | 71.405(9)                                                                           | 114.149(14)                                                                                    |
| <i>γ</i> [°]                                | 67.5610(10)                                                                                      | 89.695(4)                                                                         | 75.328(2)                                                                           | 74.224(7)                                                                         | 77.472(8)                                                                           |                                                                                                |
| Volume (Å <sup>3</sup> )                    | 874.92(11)                                                                                       | 2421.4(12)                                                                        | 1749.1(3)                                                                           | 1718.7(17)                                                                        | 1635.0(19)                                                                          | 1803(2)                                                                                        |
| Z                                           | 1                                                                                                | 2                                                                                 | 2                                                                                   | 2                                                                                 | 2                                                                                   | 2                                                                                              |
| D <sub>calc</sub> (g·cm <sup>-3</sup> )     | 1.822                                                                                            | 1.597                                                                             | 1.676                                                                               | 1.633                                                                             | 1.663                                                                               | 1.616                                                                                          |
| <i>μ</i> (mm <sup>-1</sup> )                | 0.878                                                                                            | 0.550                                                                             | 0.843                                                                               | 0.777                                                                             | 0.886                                                                               | 0.798                                                                                          |
| Collected/ Unique                           | 4791 / 3047                                                                                      | 13250 / 8480                                                                      | 9151 / 6269                                                                         | 9464 / 6081                                                                       | 8897 / 5774                                                                         | 8696 / 3215                                                                                    |
| (R <sub>int</sub> )                         | (0.014)                                                                                          | (0.018)                                                                           | (0.031)                                                                             | (0.015)                                                                           | (0.037)                                                                             | (0.151)                                                                                        |
| GOF on F <sup>2</sup>                       | 1.05                                                                                             | 1.09                                                                              | 1.02                                                                                | 1.05                                                                              | 1.00                                                                                | 0.95                                                                                           |
| R <sub>1</sub> /wR <sub>2</sub> [I > 2σ(I)] | 0.0297/0.0825                                                                                    | 0.0327/0.0862                                                                     | 0.0513/ 0.1140                                                                      | 0.0317/0.0822                                                                     | 0.0502/0.145                                                                        | 0.0880/ 0.2108                                                                                 |
| Max/min $\rho$ [e Å <sup>-3</sup> ]         | 0.61/-0.75                                                                                       | 0.68/-0.61                                                                        | 0.45/ -0.57                                                                         | 0.50/-0.42                                                                        | 1.48/-0.85                                                                          | 0.75/-1.01                                                                                     |

**Table S2.** Selected bond lengths (Å) and angles (°)

|                       |            |                        |            |                      |            |
|-----------------------|------------|------------------------|------------|----------------------|------------|
| <b>1</b>              |            |                        |            |                      |            |
| Cd(1)–O(2)            | 2.320(2)   | Cd(1)–N(1)             | 2.339(2)   | Cd(1)–N(6)#1         | 2.321(2)   |
| O(2)–Cd(1)–N(6)#1     | 89.43(8)   | O(2)–Cd(1)–N(6)#2      | 90.57(8)   | O(2)#3–Cd(1)–N(1)    | 89.83(9)   |
| O(2)–Cd(1)–N(1)       | 90.17(9)   | N(6)#1–Cd(1)–N(1)      | 90.16(8)   | N(6)#2–Cd(1)–N(1)    | 89.84(8)   |
| <b>2</b>              |            |                        |            |                      |            |
| Cd(1)–N(1)            | 2.453(2)   | Cd(1)–N(6)#2           | 2.363(2)   | Cd(1)–N(7)           | 2.323(2)   |
| Cd(1)–N(12) #4        | 2.383(2)   | Cd(1)–N(13)            | 2.310(2)   | Cd(1)–O(5)           | 2.419(3)   |
| N(13)–Cd(1)–N(7)      | 178.05(8)  | N(13)–Cd(1)–N(6)#2     | 90.87(8)   | N(7)–Cd(1)–N(6)#2    | 91.01(8)   |
| N(13)–Cd(1)–N(12)#4   | 89.38(8)   | N(7)–Cd(1)–N(12)#4     | 88.68(8)   | N(6)#2–Cd(1)–N(12)#4 | 169.22(8)  |
| N(13)–Cd(1)–O(5)      | 87.09(9)   | N(7)–Cd(1)–O(5)        | 92.58(9)   | N(6)#2–Cd(1)–O(5)    | 115.70(9)  |
| N(12)#3–Cd(1)–O(5)    | 75.07(8)   | N(13)–Cd(1)–N(1)       | 90.61(8)   | N(7)–Cd(1)–N(1)      | 89.00(8)   |
| N(6)#2–Cd(1)–N(1)     | 85.90(8)   | N(12)#3–Cd(1)–N(1)     | 83.33(7)   | O(5)–Cd(1)–N(1)      | 158.30(9)  |
| <b>3</b>              |            |                        |            |                      |            |
| Cd(1)–N(1)            | 2.380(5)   | Cd(1)–N(6)#7           | 2.348(5)   | Cd(1)–N(7)           | 2.384(4)   |
| Cd(1)–N(12)#6         | 2.341(4)   | Cd(1)–N(13)#5          | 2.291(6)   | Cd(1)–S(1)           | 2.686(2)   |
| N(13)#5–Cd(1)–N(12)#6 | 92.41(18)  | N(13)#5–Cd(1)–N(6)#7   | 88.45(18)  | N(12)#6–Cd(1)–N(6)#7 | 177.37(16) |
| N(13)#5–Cd(1)–N(1)    | 84.18(16)  | N(12)#6–Cd(1)–N(1)     | 88.95(16)  | N(6)#7–Cd(1)–N(1)    | 88.67(16)  |
| N(13)#5–Cd(1)–N(7)    | 171.02(16) | N(12)#6–Cd(1)–N(7)     | 85.05(15)  | N(6)#7–Cd(1)–N(7)    | 93.73(16)  |
| N(1)–Cd(1)–N(7)       | 87.17(15)  | N(13)#5–Cd(1)–S(1)     | 100.86(12) | N(12)#6–Cd(1)–S(1)   | 89.72(12)  |
| N(6)#7–Cd(1)–S(1)     | 92.56(12)  | N(1)–Cd(1)–S(1)        | 174.84(11) | N(7)–Cd(1)–S(1)      | 87.75(12)  |
| N(13)–C(27)–S(1)      | 178.1(6)   |                        |            |                      |            |
| <b>4</b>              |            |                        |            |                      |            |
| Cd(1)–N(1)            | 2.337(3)   | Cd(1)–N(6)#8           | 2.384(3)   | Cd(1)–N(7)           | 2.380(3)   |
| Cd(1)–N(12)#6         | 2.329(3)   | Cd(1)–N(13)            | 2.296(4)   | Cd(1)–S(1)#4         | 2.7005(17) |
| N(13)–Cd(1)–N(12)#6   | 91.80(12)  | N(13)–Cd(1)–N(1)       | 90.48(12)  | N(12)#6–Cd(1)–N(1)   | 177.10(10) |
| N(13)–Cd(1)–N(7)      | 172.15(9)  | N(12)#6–Cd(1)–N(7)     | 85.44(9)   | N(1)–Cd(1)–N(7)      | 92.07(9)   |
| N(13)–Cd(1)–N(6)#8    | 83.24(9)   | N(12)#6–Cd(1)–N(6)#8   | 88.66(9)   | N(1)–Cd(1)–N(6)#8    | 89.82(9)   |
| N(7)–Cd(1)–N(6)#8     | 89.34(8)   | N(13)–Cd(1)–S(1)#4     | 100.54(6)  | N(12)#6–Cd(1)–S(1)#4 | 89.69(6)   |
| N(1)–Cd(1)–S(1)#4     | 91.67(6)   | N(7)–Cd(1)–S(1)#4      | 86.81(6)   | N(6)#8–Cd(1)–S(1)#4  | 175.92(7)  |
| N(13)–C(27)–S(1)      | 178.5(3)   |                        |            |                      |            |
| <b>5</b>              |            |                        |            |                      |            |
| Cd(1)–N(1)            | 2.355(5)   | Cd(1)–N(6)#9           | 2.402(4)   | Cd(1)–N(7)           | 2.388(5)   |
| Cd(1)–N(12)#4         | 2.350(5)   | Cd(1)–Cl(1)            | 2.611(2)   | Cd(1)–Cl(1)#10       | 2.656(2)   |
| N(12)#4–Cd(1)–N(1)    | 169.35(15) | N(12)#4–Cd(1)–N(7)     | 81.29(15)  | N(1)–Cd(1)–N(7)      | 88.07(15)  |
| N(12)#4–Cd(1)–N(6)#9  | 90.56(15)  | N(1)–Cd(1)–N(6)#9      | 88.59(14)  | N(7)–Cd(1)–N(6)#9    | 87.09(15)  |
| N(12)#4–Cd(1)–Cl(1)   | 91.08(12)  | N(1)–Cd(1)–Cl(1)       | 91.00(9)   | N(7)–Cd(1)–Cl(1)     | 99.62(11)  |
| N(6)#9–Cd(1)–Cl(1)    | 173.26(10) | N(12)#4–Cd(1)–Cl(1)#10 | 92.75(11)  | N(1)–Cd(1)–Cl(1)#10  | 97.81(11)  |
| N(7)–Cd(1)–Cl(1)#10   | 171.53(11) | N(6)#9–Cd(1)–Cl(1)#10  | 86.96(10)  | Cl(1)–Cd(1)–Cl(1)#10 | 86.43(4)   |
| Cd(1)–Cl(1)–Cd(1)#10  | 93.57(4)   |                        |            |                      |            |
| <b>6</b>              |            |                        |            |                      |            |
| Cd(1)–N(1)            | 2.321(10)  | Cd(1)–N(6)#11          | 2.312(8)   | Cd(1)–N(7)           | 2.231(11)  |
| N(7)–Cd(1)–N(6)#11    | 89.0(3)    | N(7)–Cd(1)–N(6)#12     | 91.0(3)    | N(7)–Cd(1)–N(1)      | 89.3(4)    |

|                   |           |                    |         |                    |         |
|-------------------|-----------|--------------------|---------|--------------------|---------|
| N(7)#7–Cd(1)–N(1) | 90.8(4)   | N(6)#11–Cd(1)–N(1) | 91.5(3) | N(6)#12–Cd(1)–N(1) | 88.5(3) |
| N(7)–C(14)–S(1)   | 174.6(14) |                    |         |                    |         |

---

Symmetry code: #1  $-x+1, -y, -z$ ; #2  $-x+1, -y+1, -z$ ; #3  $-x+1, -y, -z$ ; #4  $x+1, y, z$ ; #5  $-x, -y+2, -z+1$ ; #6  $x-1, y, z$ ; #7  $-x+1, -y+1, -z+1$ ; #8  $-x+1, -y, -z+1$ ; #9  $-x+1, -y+2, -z+1$ ; #10  $-x+2, -y+1, -z+1$ ; #11  $x+1, -y+1/2, z+1/2$ ; #12  $-x, y+1/2, -z+1/2$ .

**Table S3.** Selected hydrogen bonding interaction

|          | D–H...A                | d(D–H)/ Å | d(H...A)/ Å | d(D...A)/ Å | ∠DHA / ° |
|----------|------------------------|-----------|-------------|-------------|----------|
| <b>1</b> | O(1)–H(1)···O(5)       | 0.82      | 2.59        | 3.265(6)    | 140      |
|          | O(2)–H(2A)···O(6)#1    | 0.85      | 1.97        | 2.818(4)    | 172      |
|          | O(2)–H(2B)···N(5)#2    | 0.85      | 2.11        | 2.952(4)    | 169      |
|          | C(2)–H(2)···O(3)#3     | 0.93      | 2.53        | 3.417(5)    | 159      |
|          | C(5)–H(5A)···O(4)      | 0.97      | 2.46        | 3.291(5)    | 143      |
|          | C(6)–H(6)···O(3)#4     | 0.93      | 2.34        | 3.268(4)    | 172      |
|          | C(7)–H(7)···O(6)       | 0.93      | 2.53        | 3.449(5)    | 170      |
| <b>2</b> | O(1)–H(1W)···O(7)#1    | 0.82      | 2.01        | 2.822(3)    | 170      |
|          | O(2)–H(2W)···O(7)      | 0.82      | 2.08        | 2.820(3)    | 150      |
|          | O(3)–H(3W)···F(4)#5    | 0.82      | 2.41        | 2.990(3)    | 128      |
|          | O(10)–H(10A)···N(14)#6 | 0.96      | 2.37        | 3.214(7)    | 147      |
|          | C(2)–H(2)···O(9)#1     | 0.93      | 2.47        | 3.288(4)    | 147      |
|          | C(19)–H(19)···O(8)     | 0.93      | 2.30        | 3.182(4)    | 157      |
|          | C(29)–H(29A)···F(6)#7  | 0.97      | 2.34        | 3.267(4)    | 161      |
|          | C(29)–H(29B)···F(1)#8  | 0.97      | 2.44        | 3.312(4)    | 149      |
|          | C(1)–H(1A)···O(6)#9    | 0.93      | 2.60        | 3.373(4)    | 140      |
|          | C(1)–H(1A)···O(5)#9    | 0.93      | 2.69        | 3.411(4)    | 134      |
|          | C(14)–H(14)···O(6)#9   | 0.93      | 2.62        | 3.439(4)    | 148      |
| <b>3</b> | O(1)–H(1W)···O(5)      | 0.82      | 2.21        | 2.969(7)    | 155      |
|          | O(2)–H(2W)···O(5)#10   | 0.82      | 2.37        | 3.057(7)    | 142      |
|          | O(2)–H(2W)···O(6)#10   | 0.82      | 2.53        | 3.319(9)    | 162      |
|          | C(3)–H(3B)···O(4)#10   | 0.93      | 2.66        | 3.591(7)    | 163      |
|          | C(3)–H(3A)···F(1)      | 0.97      | 2.27        | 2.927(6)    | 124      |
|          | C(18)–H(18B)···F(2)#11 | 0.97      | 2.48        | 3.190(8)    | 130      |
| <b>4</b> | O(2)–H(2W)···O(3)      | 0.82      | 2.02        | 2.757(4)    | 150      |
|          | C(6)–H(6)···O(5)       | 0.93      | 2.42        | 3.233(5)    | 145      |
|          | C(18)–H(18A)···O(4)    | 0.97      | 2.64        | 3.482(5)    | 146      |
|          | C(16)–H(16A)···O(3)    | 0.97      | 2.61        | 3.351(5)    | 134      |
|          | C(5)–H(5B)···F(4)      | 0.97      | 2.35        | 2.966(4)    | 121      |
|          | C(16)–H(16A)···F(1)    | 0.97      | 2.44        | 3.054(4)    | 120      |
|          | C(16)–H(16B)···N(11)   | 0.97      | 2.51        | 3.152(6)    | 124      |
|          | C(18)–H(18A)···F(3)#12 | 0.97      | 2.49        | 3.366(6)    | 150      |
|          | C(19)–H(19)···F(3)     | 0.93      | 2.44        | 3.155(5)    | 133      |
| <b>5</b> | O(2)–H(2W)···N(13)     | 0.82      | 1.99        | 2.772(12)   | 159      |
|          | C(14)–H(14)···F(2)#13  | 0.93      | 2.53        | 3.289(8)    | 139      |
|          | C(15)–H(15)···N(2)#10  | 0.93      | 2.43        | 3.323(7)    | 160      |
|          | C(25)–H(25)···N(13)    | 0.93      | 2.38        | 3.155(12)   | 141      |
| <b>6</b> | O(1)–H(1C)···N(2)      | 0.83      | 2.16        | 2.882(7)    | 145      |
|          | O(1W)–H(1WB)···S(1)#10 | 0.97      | 2.57        | 3.422(6)    | 146      |
|          | C(1)–H(1)···O(1W)#10   | 0.93      | 2.26        | 3.183(7)    | 169      |

Symmetry code: #1 1-x,1-y,-z; #2 -x,1-y,-z; #3 -1+x,y,z; #4 -1+x,1+y,z; #5 x,y,-1+z; #6 -1+x,y,1+z; #7 2-x,1-y,-1-z; #8 2-x,1-y,-z; #9 2-x,-y,-z; #10 1-x,1-y,1-z; #11 2-x,1-y,-z; #12 1+x,y,-1+z; #13 x,y,1+z

**Fig. S1.** The  $\text{ClO}_4^-$  anions are fixed between the 1-D chain through hydrogen bonds in **1**.

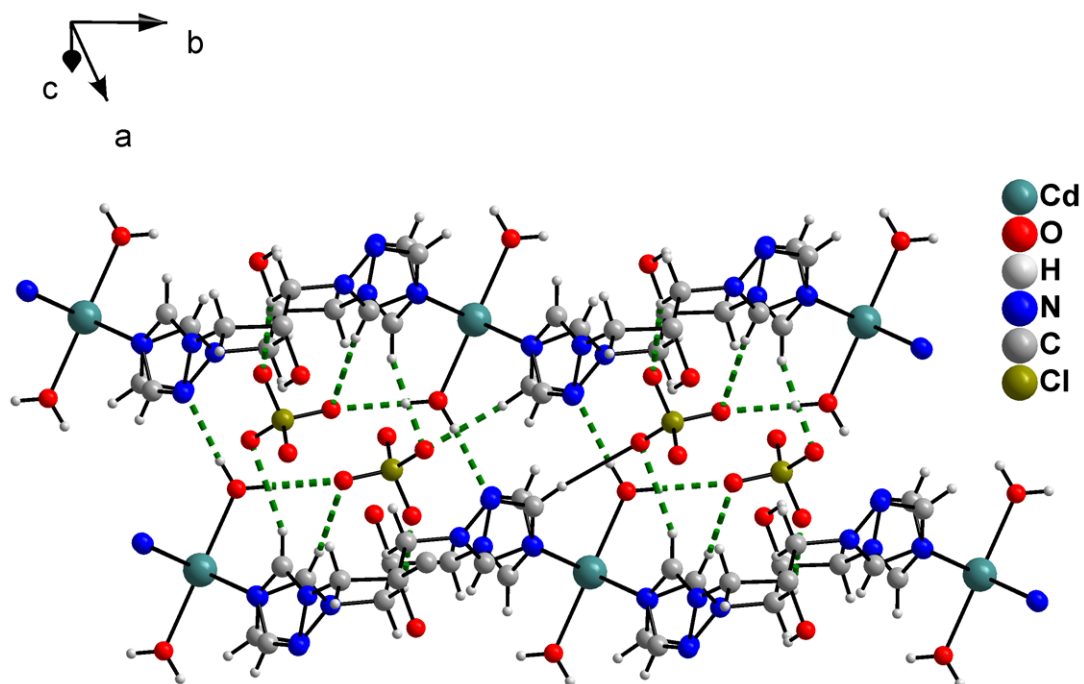

**Figure S2.** (a) Coordination geometry of **2**, (b) 1D ladder-like structure of **2**.

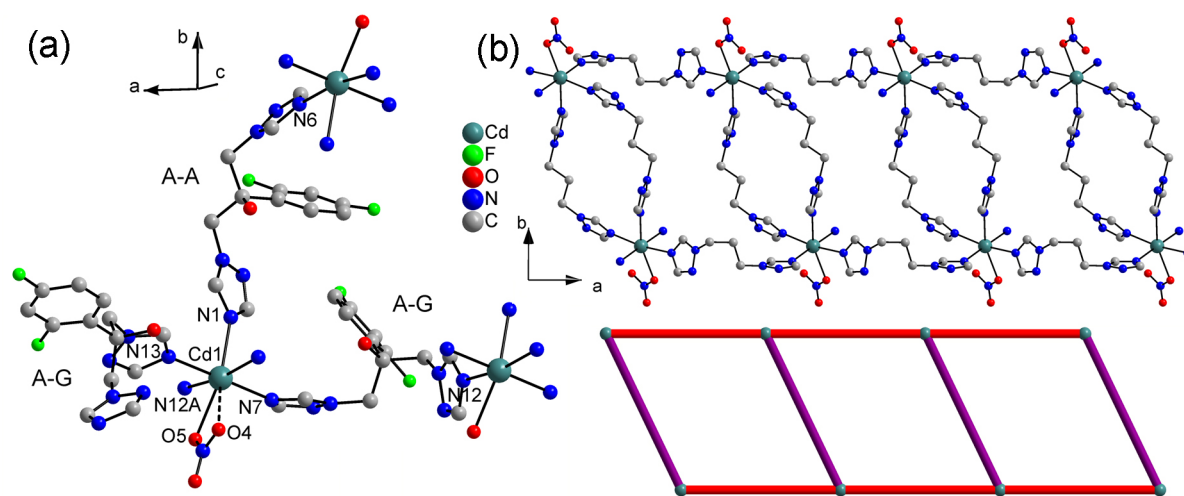

**Fig. S3** (a) The  $\text{ClO}_4^-$  anions are fixed between the layers in **3** through hydrogen bonds, (b)

The  $\text{NO}_3^-$  anions are fixed between the layers in **4** through hydrogen bonds

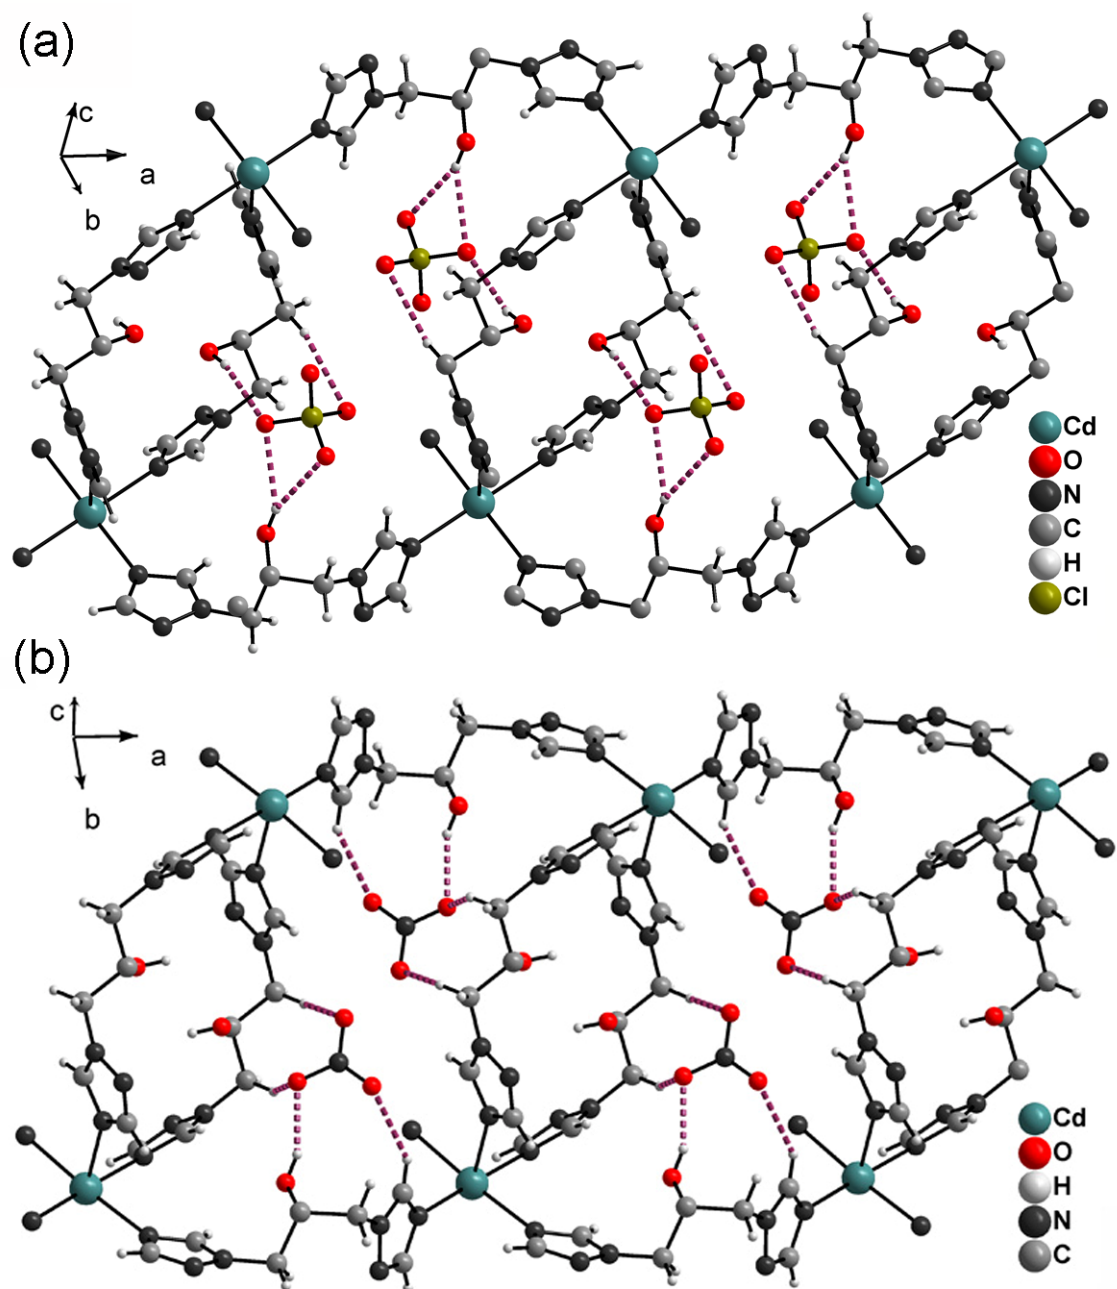



**Figure S4.** Coordination geometry of **5**.

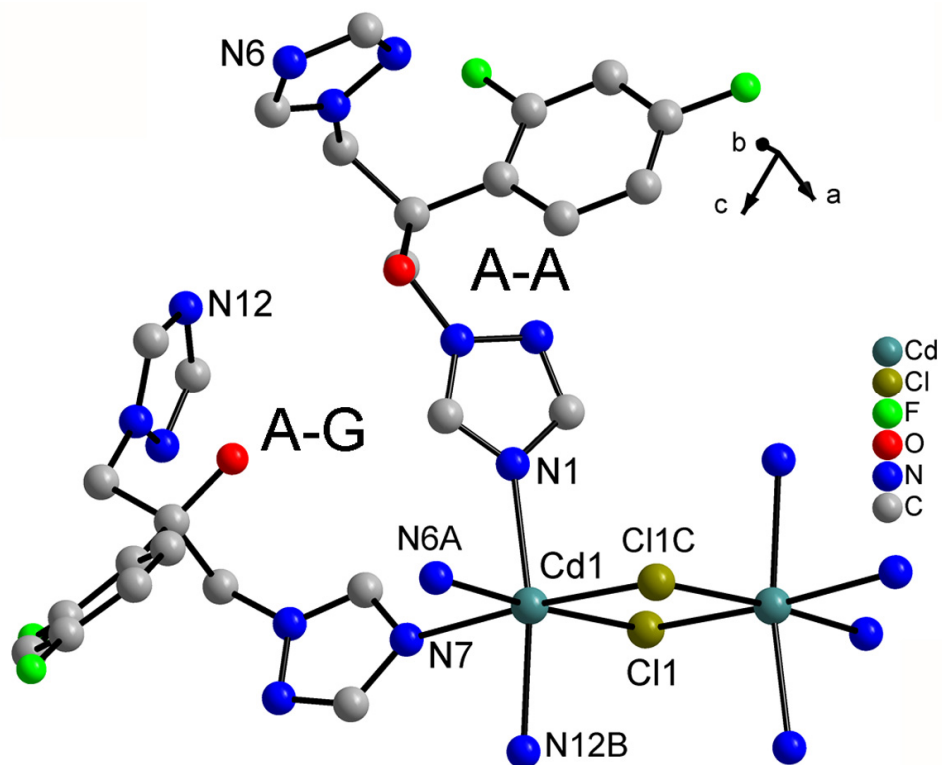

**Figure S5.** Coordination geometry of **6**.

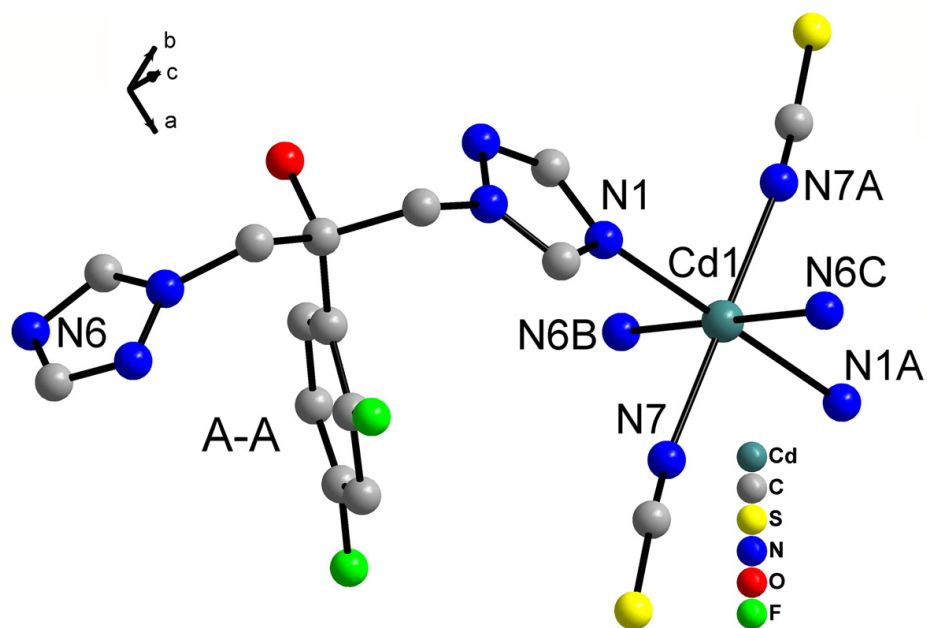

**Figure S6.** PXRD and simulated spectra from crystal data for polymers **3**, **4**, **5** and **6**

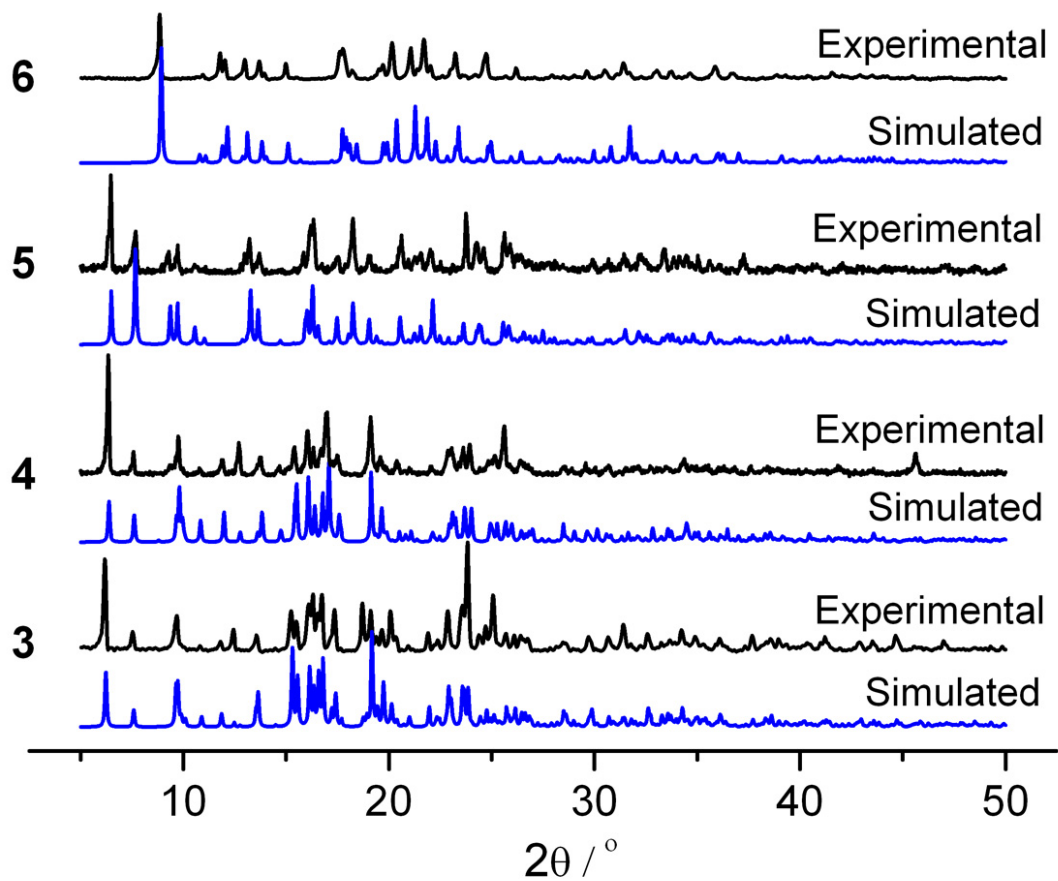

**Fig. S7** The energy related conformation transformation in the range of  $-180\sim 180^\circ$  calculated by *Conformation Tools* in *Material Studio* 4.3

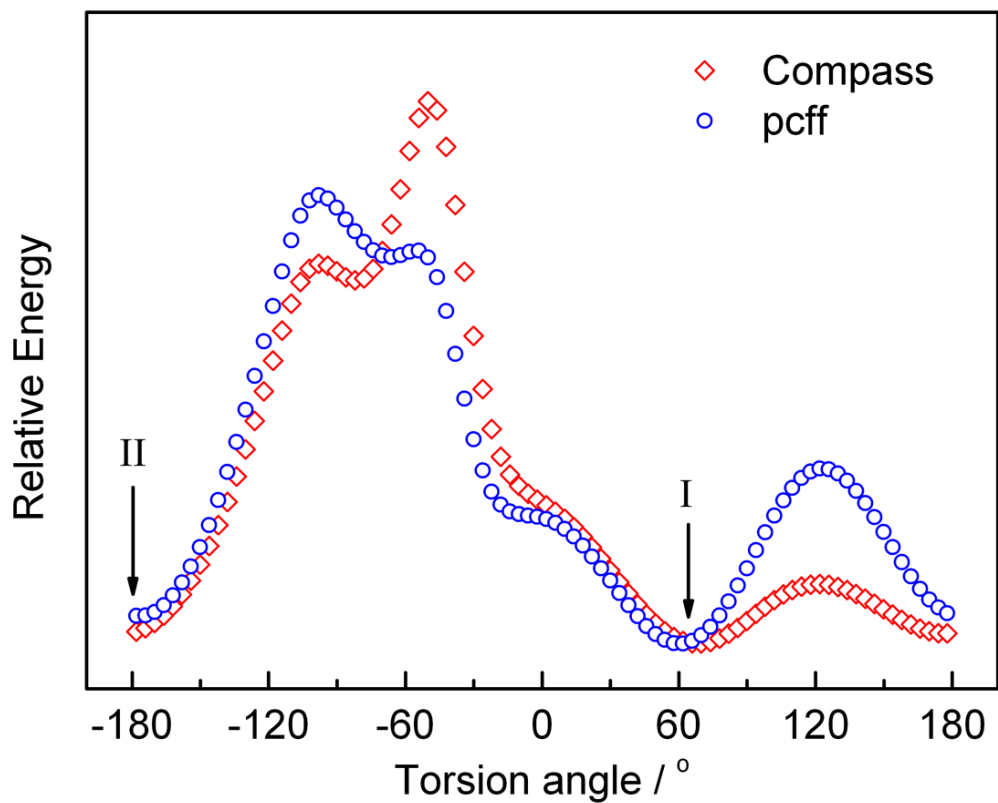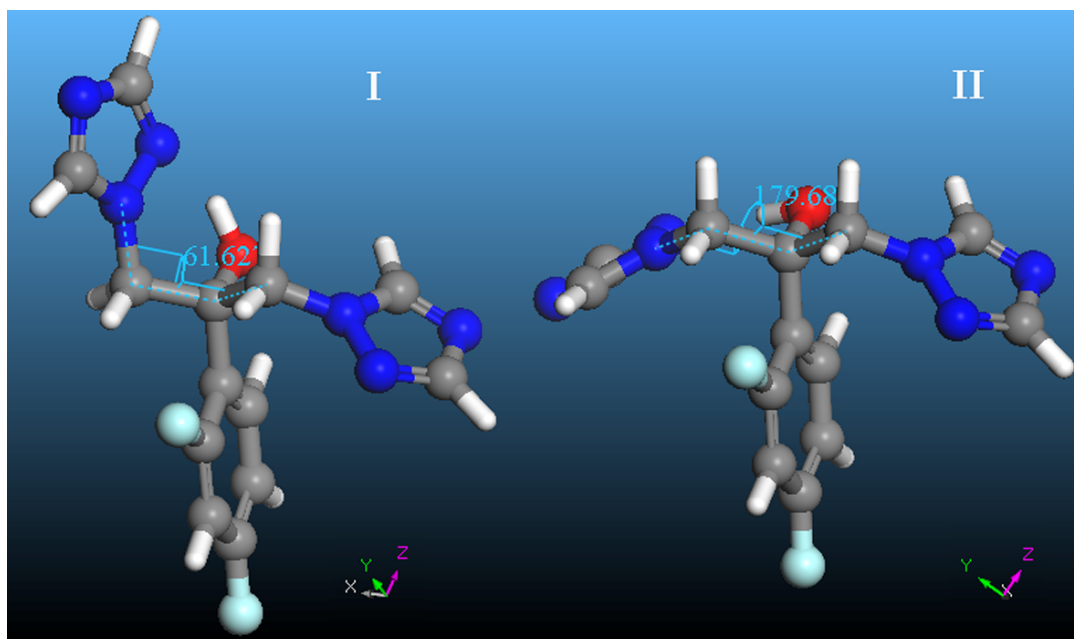

NOTE: The structure of HFlu in this calculation was obtained directly from CIF data of free HFlu ligand

and then geometry optimized by *Dmol*<sup>3</sup> program (Functional: BLYP; Basis set: DNP, all calculation quality set to be fine). The optimized structure showed no imaginary frequency. The conformational calculation was then carried out with *Conformers* program (Forcefield: Compass or peff. All calculation quality set to be ultra-fine). Only gauche form to anti form transformation process was taken in consideration and the motion groups were kept rigid. The results of the two stable conformers **I** and **II** were then geometry optimized.

**Figure S8.** TGA analyses for coordination polymers **1-6**

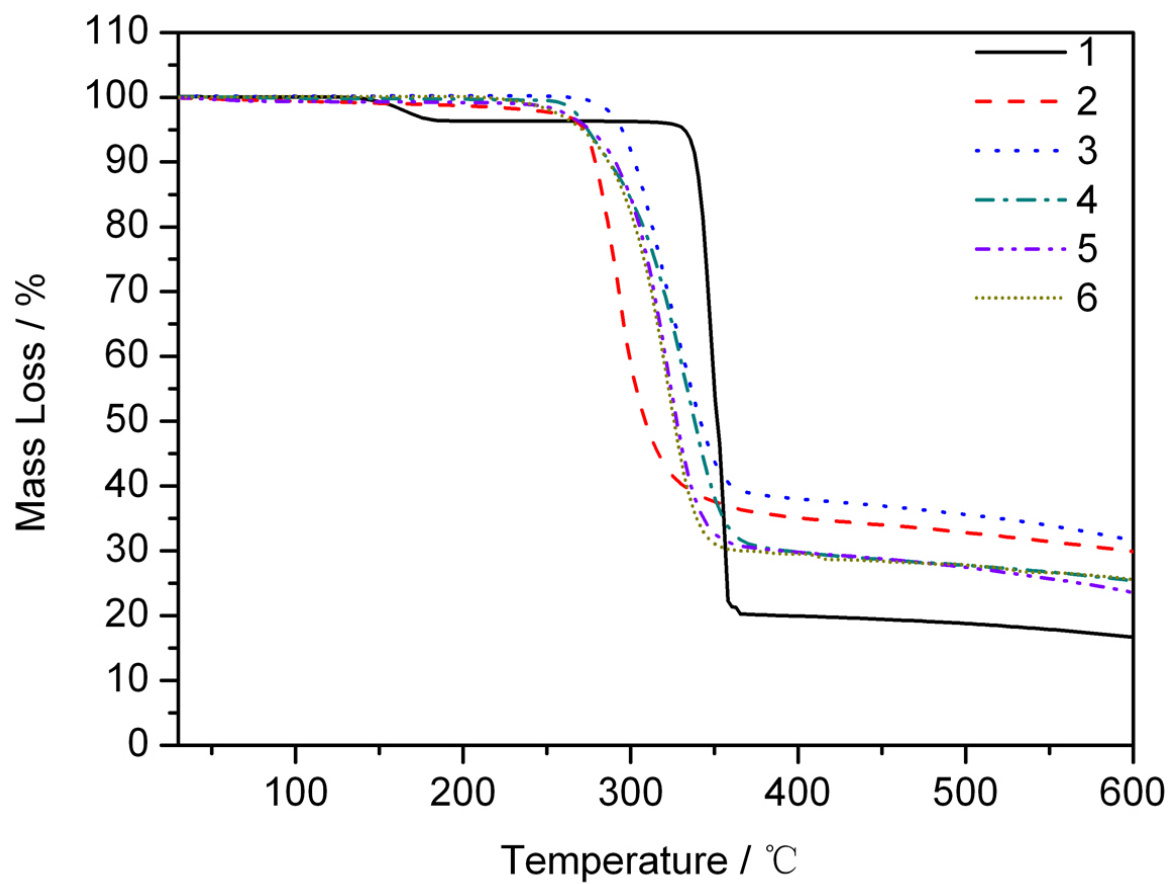

**Figure S9.** The emission spectra of coordination polymers **1-6** excited by 261 nm.

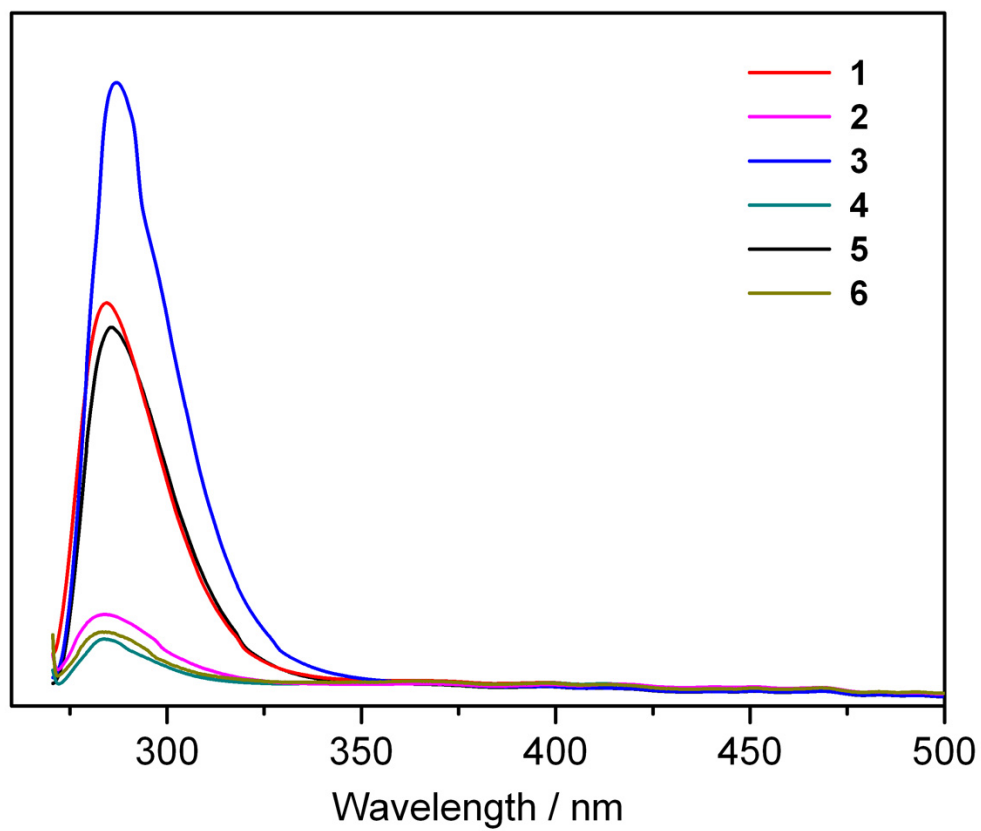

Supplement: b914049b.pdf [file b914049b.pdf]
